# Supplementary material for: Isolation and Characterization of the Lytic Pseudoxanthomonas kaohsiungensi Phage PW916
Source: MDPI journal article supplement (doi:10.3390/v14081709), 2022-08-02
Supplement: s1 [file s1]

Supplementary Data

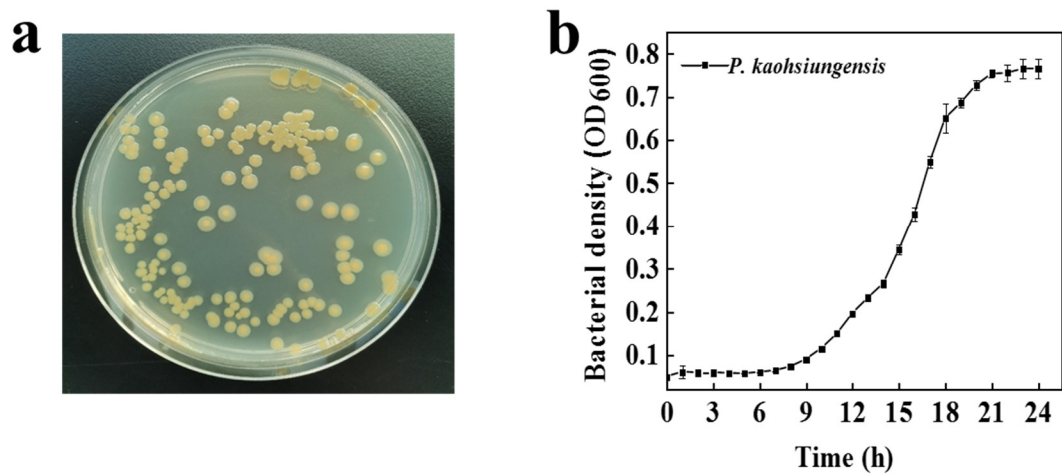

**Figure S1.** Biological features of host. (a) Colonial morphology of *P. kaohsiungensis*. (b) Growth curve of *P. kaohsiungensis*.

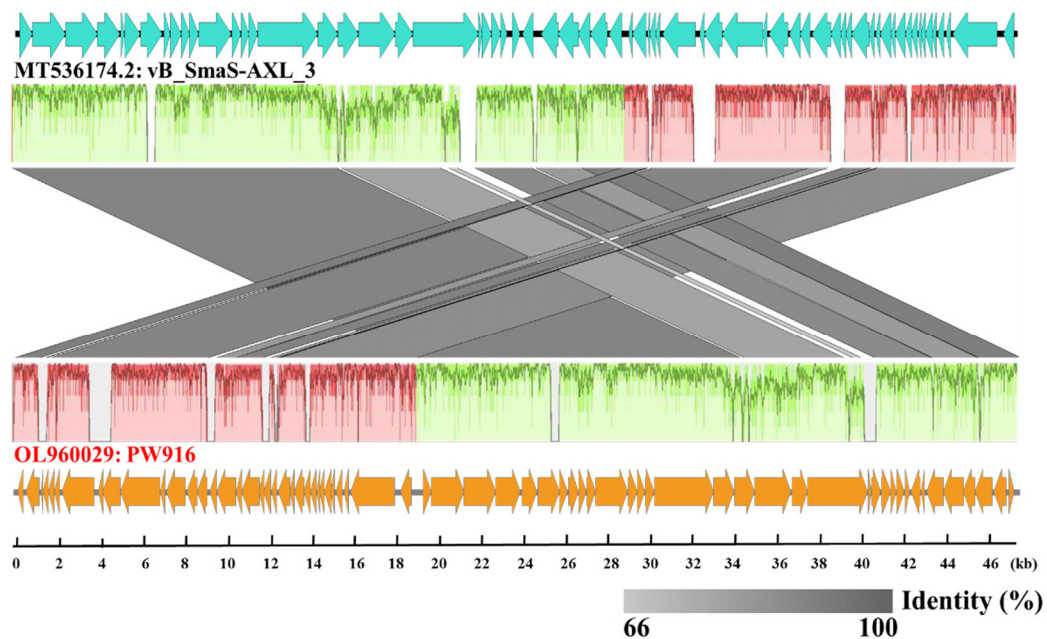

**Figure S2.** Genomic comparison between phage PW916 and Caudoviricetes phage vB\_SmaS-AXL\_3 (RefSeq accession number MT536174.2). Arrows represent open reading frames (ORFs) of the phage and gray bands denote the similarity in nucleotide sequences between genomic regions.

**Table S1.** Minimum inhibitory concentration (MIC) of *P. kaohsiungensis*.

| Antibiotic Name | MICs (µg/mL) | Antimicrobial Susceptibility Tests of CLSI (µg/mL) |
|-----------------|--------------|----------------------------------------------------|
| Tetracycline    | 0.42         | 4                                                  |
| Chloramphenicol | 1.64         | 16                                                 |
| Ampicillin      | 3.41         | 100                                                |
| Kanamycin       | 121.3        | 100                                                |
| Amoxicillin     | 74.6         | 64                                                 |
| Streptomycin    | 46.55        | 30                                                 |
| Rifampin        | 1.87         | 100                                                |

**Table S2.** Comparative analysis of phage PW916 with IMG/VR database based on genome.

| Genome ID  | Subject Length(bp) | Estimated Completeness (%) | Identities (%) | Phage Lineage   | Predicted Host Lineage |
|------------|--------------------|----------------------------|----------------|-----------------|------------------------|
| 3300014059 | 41149              | 100                        | 84             | Caudovirales;   | Hydrogenophilales      |
| 3300025115 | 38459              | 100                        | 79             | Caudovirales;   | -                      |
| 3300001594 | 129024             | 100                        | 73             | Caudoviricetes; | Thioalkalivibrio       |
| 3300008339 | 37900              | 100                        | 77             | Caudovirales    | -                      |
| 3300003972 | 45492              | 100                        | 88             | Caudoviricetes  | -                      |
| 3300000227 | 34746              | 100                        | 78             | Caudovirales    | -                      |
| 3300008266 | 37900              | 100                        | 77             | Caudovirales    | -                      |
| 3300001592 | 129042             | 100                        | 73             | Caudoviricetes  | Thioalkalivibrio;      |
| 3300008450 | 37900              | 100                        | 77             | Caudovirales    | -                      |
| 3300020156 | 47991              | 100                        | 76             | Caudoviricetes  | -                      |
| 3300008451 | 37900              | 99.66                      | 77             | Caudovirales    | -                      |
| 3300020711 | 38318              | 98.03                      | 78             | Caudovirales    | -                      |
| 3300025779 | 38287              | 97.96                      | 78             | Caudovirales    | -                      |
| 3300027111 | 50204              | 97.92                      | 88             | Caudoviricetes  | Sinorhizobium;         |
| 3300002220 | 40879              | 95.38                      | 73             | Caudovirales    | Thioalkalivibrio       |
| 3300005898 | 38045              | 83.20                      | 71             | -               | -                      |
